# Supplementary material for: Surfactant-enhanced coagulation and flocculation improves the removal of perfluoroalkyl substances from surface water
Source: Royal Society of Chemistry journal article supplement (doi:10.1039/d4va00093e), 2024-01-01
Supplement: d4va00093e1.pdf [file d4va00093e1.pdf]

## Supplemental Information

### **Surfactant-enhanced coagulation and flocculation improves the removal of perfluoroalkyl substances from surface water**

Amith Sadananda Maroli<sup>a</sup>, Yi Zhang<sup>a</sup>, Jonathan Lubiantoro<sup>a</sup>, Arjun K. Venkatesan<sup>b,\*</sup>

<sup>a</sup>New York State Center for Clean Water Technology, Stony Brook University, Stony Brook, NY  
11794

<sup>b</sup>Department of Civil and Environmental Engineering, New Jersey Institute of Technology,  
Newark, NJ 07102

\*Corresponding author email: [arjun.venkatesan@njit.edu](mailto:arjun.venkatesan@njit.edu); phone: +1 973-596-5884

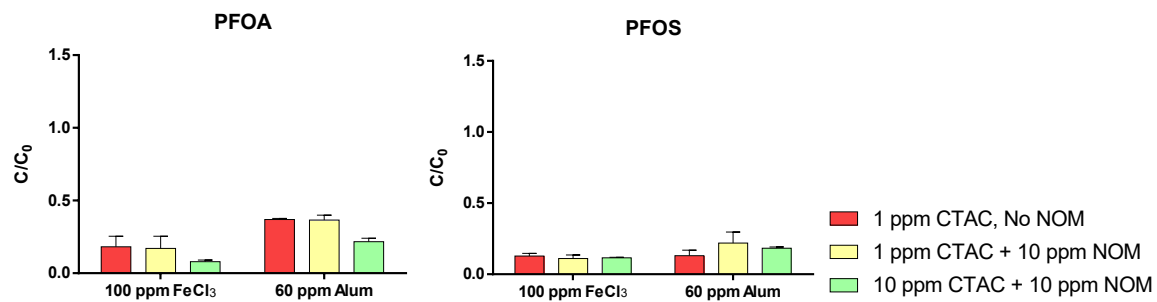

**Figure S1.** Removal of PFOA and PFOS in the presence increased NOM (10 mg/L) and CTAC (10 mg/L) dosage.

**Table S1.** Liquid chromatography and mass spectrometry conditions

| <i>Parameter</i>         | <i>Value</i>                                                                                                                                                                                                                                                                                    |            |    |     |    |     |    |     |    |      |    |      |     |
|--------------------------|-------------------------------------------------------------------------------------------------------------------------------------------------------------------------------------------------------------------------------------------------------------------------------------------------|------------|----|-----|----|-----|----|-----|----|------|----|------|-----|
| LC                       | Agilent G7120A 1290 Binary Pump<br>Agilent G7116A 1260 Multicolumn Thermostat<br>Agilent G7167A 1260 Multisampler                                                                                                                                                                               |            |    |     |    |     |    |     |    |      |    |      |     |
| Analytical column        | Agilent ZOBRAx Eclipse Plus C18<br>3.0 x 50 mm, 1.8 $\mu$ m                                                                                                                                                                                                                                     |            |    |     |    |     |    |     |    |      |    |      |     |
| Delayed column           | Agilent ZOBRAx Eclipse Plus C18<br>4.6 x 50 mm, 3.5 $\mu$ m                                                                                                                                                                                                                                     |            |    |     |    |     |    |     |    |      |    |      |     |
| Column temperature       | 50 °C                                                                                                                                                                                                                                                                                           |            |    |     |    |     |    |     |    |      |    |      |     |
| Injection volume         | 5 $\mu$ L                                                                                                                                                                                                                                                                                       |            |    |     |    |     |    |     |    |      |    |      |     |
| Mobile phase             | A) 5 mM Ammonium acetate in water<br>B) 100% MeOH                                                                                                                                                                                                                                               |            |    |     |    |     |    |     |    |      |    |      |     |
| Flow rate                | 0.4 mL/min                                                                                                                                                                                                                                                                                      |            |    |     |    |     |    |     |    |      |    |      |     |
| Gradient                 | <table border="1"> <thead> <tr> <th>Time (min)</th> <th>%B</th> </tr> </thead> <tbody> <tr> <td>0.0</td> <td>10</td> </tr> <tr> <td>0.5</td> <td>10</td> </tr> <tr> <td>2.0</td> <td>30</td> </tr> <tr> <td>14.0</td> <td>95</td> </tr> <tr> <td>14.5</td> <td>100</td> </tr> </tbody> </table> | Time (min) | %B | 0.0 | 10 | 0.5 | 10 | 2.0 | 30 | 14.0 | 95 | 14.5 | 100 |
| Time (min)               | %B                                                                                                                                                                                                                                                                                              |            |    |     |    |     |    |     |    |      |    |      |     |
| 0.0                      | 10                                                                                                                                                                                                                                                                                              |            |    |     |    |     |    |     |    |      |    |      |     |
| 0.5                      | 10                                                                                                                                                                                                                                                                                              |            |    |     |    |     |    |     |    |      |    |      |     |
| 2.0                      | 30                                                                                                                                                                                                                                                                                              |            |    |     |    |     |    |     |    |      |    |      |     |
| 14.0                     | 95                                                                                                                                                                                                                                                                                              |            |    |     |    |     |    |     |    |      |    |      |     |
| 14.5                     | 100                                                                                                                                                                                                                                                                                             |            |    |     |    |     |    |     |    |      |    |      |     |
| Stop time                | 16.5 minutes                                                                                                                                                                                                                                                                                    |            |    |     |    |     |    |     |    |      |    |      |     |
| Post time                | 6 minutes                                                                                                                                                                                                                                                                                       |            |    |     |    |     |    |     |    |      |    |      |     |
| MS Instrument conditions |                                                                                                                                                                                                                                                                                                 |            |    |     |    |     |    |     |    |      |    |      |     |
| <i>Parameter</i>         | <i>Value</i>                                                                                                                                                                                                                                                                                    |            |    |     |    |     |    |     |    |      |    |      |     |
| MS                       | Agilent 6495 Triple Quadrupole MS/MS<br>Agilent Jet Stream ESI source                                                                                                                                                                                                                           |            |    |     |    |     |    |     |    |      |    |      |     |
| Gas Temperature          | 175 °C                                                                                                                                                                                                                                                                                          |            |    |     |    |     |    |     |    |      |    |      |     |
| Gas flow                 | 17 L/min                                                                                                                                                                                                                                                                                        |            |    |     |    |     |    |     |    |      |    |      |     |
| Nebulizer                | 20 psi                                                                                                                                                                                                                                                                                          |            |    |     |    |     |    |     |    |      |    |      |     |
| Sheath gas temperature   | 275 °C                                                                                                                                                                                                                                                                                          |            |    |     |    |     |    |     |    |      |    |      |     |
| Sheath gas flow          | 11 L/min                                                                                                                                                                                                                                                                                        |            |    |     |    |     |    |     |    |      |    |      |     |
| Capillary voltage (Neg)  | 2500 V                                                                                                                                                                                                                                                                                          |            |    |     |    |     |    |     |    |      |    |      |     |
| Nozzle voltage (Neg)     | 0 V                                                                                                                                                                                                                                                                                             |            |    |     |    |     |    |     |    |      |    |      |     |
| iFunnel                  |                                                                                                                                                                                                                                                                                                 |            |    |     |    |     |    |     |    |      |    |      |     |
| High pressure RF (Neg)   | 90 V                                                                                                                                                                                                                                                                                            |            |    |     |    |     |    |     |    |      |    |      |     |
| Low pressure RF (Neg)    | 40 V                                                                                                                                                                                                                                                                                            |            |    |     |    |     |    |     |    |      |    |      |     |

**Table S2.** The MRM transitions for PFAS analysts and internal standards (IS) applied.

| <b>Analyte</b>                      |                                                                      | <b>Precursor Ion (m/z)</b> | <b>Product Ion 1 (m/z)</b> | <b>Product Ion 2 (m/z)</b> |
|-------------------------------------|----------------------------------------------------------------------|----------------------------|----------------------------|----------------------------|
| PFBS                                | Perfluorobutanesulfonic acid                                         | 299                        | 80                         | 99                         |
| PFBA                                | Perfluorobutanoic acid                                               | 213                        | 169                        | -                          |
| PFOA                                | Perfluorooctanoic acid                                               | 413                        | 369                        | 169                        |
| PFOS*                               | Perfluorooctanesulfonic acid                                         | 499                        | 80                         | 99                         |
| 4:2 FTS                             | 4:2 fluorotelomer sulfonic acid                                      | 327                        | 81                         | 307                        |
| 8:2 FTS                             | 8:2 fluorotelomer sulfonic acid                                      | 527                        | 81                         | 507                        |
| <b>Internal standard</b>            |                                                                      | <b>Precursor Ion (m/z)</b> | <b>Product Ion (m/z)</b>   | <b>Product Ion 2 (m/z)</b> |
| <sup>13</sup> C <sub>3</sub> -PFBA  | Perfluoro-n- [1,2,3,4- <sup>13</sup> C <sub>4</sub> ] butanoic acid  | 216                        | 172                        | -                          |
| <sup>13</sup> C <sub>3</sub> -PFBS  | Perfluoro-1-[2,3,4- <sup>13</sup> C <sub>3</sub> ] butanesulfonate   | 302                        | 80                         | -                          |
| <sup>13</sup> C <sub>5</sub> -PFHxA | Perfluoro-n-[1,2,3,4,6- <sup>13</sup> C <sub>5</sub> ] hexanoic acid | 318                        | 273                        | -                          |
| <sup>13</sup> C <sub>3</sub> -PFHxS | Perfluoro-1-[1,2,3- <sup>13</sup> C <sub>3</sub> ] hexanesulfonate   | 402                        | 80                         | -                          |
| <sup>13</sup> C <sub>8</sub> -PFOA  | Perfluoro-n-[ <sup>13</sup> C <sub>8</sub> ] octanoic acid           | 421                        | 376                        | -                          |
| <sup>13</sup> C <sub>8</sub> -PFOS  | Perfluoro-1-[ <sup>13</sup> C <sub>8</sub> ] octanesulfonate         | 507                        | 80                         | -                          |

Table S3. Turbidity and pH measured for the batch samples tested under various conditions in Figure 5 before and after coagulation.

| Turbidity and pH                   | Batch-1 (PAC 8mg/L) |      | Batch-2 (PAC 8mg/L Dup) |      | Batch-3 (PAC 16 mg/L) |      | Batch-4 (PAC 16 mg/L Dup) |      |
|------------------------------------|---------------------|------|-------------------------|------|-----------------------|------|---------------------------|------|
|                                    | before coagulation  |      |                         |      |                       |      |                           |      |
|                                    | Turbidity           | pH   | Turbidity               | pH   | Turbidity             | pH   | Turbidity                 | pH   |
| Control PFAS                       | 22.97               | 7.15 | 23.21                   | 7.11 | 23.4                  | 7.18 | 24.5                      | 6.99 |
|                                    | after coagulation   |      |                         |      |                       |      |                           |      |
| PAC+ PFAS                          | 23.37               | 7.3  | 21.51                   | 7.3  | 23.4                  | 6.91 | 21.63                     | 7.21 |
| PAC +FeCl <sub>3</sub> + PFAS      | 0.81                | 3.75 | 0.77                    | 3.76 | 0.72                  | 3.67 | 2.05                      | 3.52 |
| CTAC+ FeCl <sub>3</sub> + PFAS     | 0.35                | 3.67 | 2.6                     | 3.66 | 0.48                  | 3.65 | 1.32                      | 3.5  |
| CTAC+ PAC+FeCl <sub>3</sub> + PFAS | 0.76                | 3.74 | 1.33                    | 3.6  | 1.18                  | 4.22 | 2.03                      | 3.63 |
| CTAC+ PAC+ PFAS                    | 18.10               | 6.75 | 20.4                    | 6.27 | 21.5                  | 6.13 | 23.00                     | 7.18 |
| Control PFAS                       | 18.40               | 7.01 | 21.4                    | 7.04 | 27.1                  | 6.71 | 21.27                     | 7.27 |
